1 **Title**

2 **Inflammatory signals are sufficient to elicit TOX expression in mouse and human CD8 T cells**

3

4 **Authors**

5 Nicholas J Maurice<sup>1,2,\*</sup>, Jacqueline Berner<sup>3,\*</sup>, Alexis K Taber<sup>1</sup>, Dietmar Zehn<sup>3,°</sup>, Martin Prlic<sup>1,4,°</sup>

6

7 <sup>1</sup> Vaccine and Infectious Disease Division, Fred Hutchinson Cancer Research Center, Seattle, WA 98109

8 <sup>2</sup> Molecular and Cellular Biology Graduate Program, University of Washington, Seattle, WA 98195

9 <sup>3</sup> Division of Animal Physiology and Immunology, School of Life Sciences Weihenstephan, Technical

10 University of Munich, Freising, Germany

11 <sup>4</sup> Department of Immunology, University of Washington, Seattle, WA 98109

12

13 \* Authors equally contributed to this work

14 ° Co-corresponding authors

15

16 Correspondence should be addressed to: D.Z. [dietmar.zehn@tum.de](mailto:dietmar.zehn@tum.de) or M.P. [mprlic@fredhutch.org](mailto:mprlic@fredhutch.org)

17

18 **Competing interests**

19 The authors declare no competing interests.

20

21 **Abstract**

22 T cell receptor (TCR) stimulation leads to expression of the transcription factor TOX. Prolonged TCR  
23 signaling, such as encountered during chronic infections or in tumors, leads to sustained TOX  
24 expression, which induces a state of exhaustion or dysfunction. While CD8 memory T cells ( $T_{\text{mem}}$ ) in  
25 specific pathogen-free laboratory mice typically do not express TOX, functional human  $T_{\text{mem}}$  show  
26 heterogeneous TOX expression levels. Whether TCR-independent mechanisms can alter TOX  
27 expression in human and murine  $T_{\text{mem}}$  has not been defined. We report that human and mouse  $T_{\text{mem}}$   
28 increase TOX expression following stimulation with inflammatory cytokines IL-12, IL-15, and IL-18. TOX  
29 and PD-1 expression patterns often appear to be directly correlated, however, we found that TOX is not  
30 necessary for cytokine-driven expression of PD-1. Together, these observations highlight that  
31 inflammation is sufficient to alter TOX and PD-1 expression and that the signals regulating TOX  
32 expression appear well conserved in human and murine  $T_{\text{mem}}$ .

33

## 34 Introduction

35 T cell exhaustion (i.e. dysfunction) is driven by chronic TCR stimulation with cognate antigen  
36 (Ag)<sup>1, 2, 3</sup>. It describes a differentiation state in which T cells have diminished capacity to respond to  
37 stimulatory inputs and limited effector capacity<sup>2, 3, 4</sup>. The purpose of T cell exhaustion during chronic  
38 infections may be to limit tissue pathologies when pathogen cannot be immunologically eliminated<sup>5, 6</sup>.  
39 Though exhaustion could be considered an immunologic concession during chronic infection, it also  
40 occurs in tumors and causes an attenuated anti-tumor cytotoxic T cell response<sup>7</sup>. Thus, mechanistically  
41 understanding and therapeutically overcoming T cell exhaustion has been a major goal of tumor  
42 immunotherapy. Chronic TCR stimulation elicits a program that leads to constitutively high expression of  
43 programmed cell death 1 (PD-1)<sup>8</sup>. PD-1 is an inhibitory receptor which is expressed by activated and  
44 exhausted T cells and often used as a biomarker to infer T cell functionality<sup>9</sup>. When bound to its ligands,  
45 PD-1 negatively regulates T cell function<sup>2</sup>. Therapeutic targeting of PD-1 with monoclonal antibodies,  
46 also referred to as immune checkpoint inhibitors, can reinvigorate a subset of these PD-1 expressing T  
47 cells<sup>2, 10, 11, 12</sup>.

48 A set of recent studies demonstrated that the transcription factor, thymocyte selection-associated  
49 high mobility group box (TOX) protein, drives or stabilizes this TCR-mediated T cell dysfunction and PD-  
50 1 upregulation<sup>6, 13, 14, 15, 16</sup>. When stably expressed, TOX drove Ag-specific T cell exhaustion in mouse  
51 models of chronic lymphocytic choriomeningitis virus (LCMV) infection, transplantable B16 melanoma,  
52 and inducible hepatocellular carcinoma<sup>6, 13, 14</sup>. Further, putative tumor Ag-specific CD8 T cells isolated  
53 from primary human breast, ovarian, and skin cancer samples, as well as those specific for hepatitis C  
54 virus (HCV), mirrored this phenotype, suggesting TOX dictates exhaustion programs in humans, too<sup>6, 13,</sup>  
55 <sup>14</sup>. Of note, TOX expression by HCV-specific T cells was reduced following treatment and clearance of  
56 the infection but still detectable at higher levels than in T cells from HCV infections that spontaneously  
57 resolved and among T cells specific for influenza A virus (IAV)<sup>6</sup>. Mechanistic insight was provided by  
58 targeted deletion of TOX in Ag-specific cytotoxic T cells, which diminished PD-1 expression and restored  
59 functionality at the expense of cell survival<sup>6, 13</sup>. Therefore, TOX concedes activation and effector function  
60 for exhaustion (i.e. PD-1 expression) and T cell survival during chronic TCR stimulation. In instances of

61 brief TCR engagement, TOX is transiently induced to a level lower than that of exhausted T cells, but  
62 with limited known functional consequence<sup>6, 13, 14</sup>.

63 While the requirement for TOX has been well defined in the context of TCR-mediated  
64 dysfunction, there is nascent evidence that TOX expression by itself is not indicative of T cell exhaustion.  
65 Recent studies illustrated that TOX expression is detected in some functional CD8 memory T cells  
66 ( $T_{\text{mem}}$ ), for instance in CD8 effector memory ( $T_{\text{EM}}$ ) and effector memory CD45RA-expressing ( $T_{\text{EMRA}}$ )  
67 subsets<sup>17</sup>. CD8  $T_{\text{mem}}$  specific for the latent viruses, cytomegalovirus (CMV) and Epstein-Barr virus (EBV),  
68 had elevated TOX expression, compared to those specific for acute infections, which further suggests  
69 that TCR signals are critical in regulating TOX expression<sup>17</sup>. In a second study, it was shown that a  
70 fraction of the human  $T_{\text{mem}}$  population expresses *TOX* transcripts amongst other signature genes  
71 typically associated with T cell exhaustion<sup>18</sup>. The observation that functional human memory T cells  
72 express TOX also led to questioning whether TOX is functionally conserved between mouse and human  
73 T cells<sup>19</sup>. Further complicating TOX and exhaustion, the murine tissue resident memory T cell ( $T_{\text{RM}}$ )  
74 transcriptome is characterized by concomitant expression of transcripts encoding *Tox*, exhaustion  
75 markers, TCR signaling components, and cytotoxic molecules, well after initial priming events<sup>20, 21</sup>. While  
76 the role of TOX in these TOX-expressing populations with and without signs of T cell exhaustion is not  
77 fully understood, these data suggest that TOX expression by memory T cells cannot be reliably used to  
78 extrapolate T cell function.

79 While the role of TCR signals in initiating and maintaining PD-1 and TOX expression has been  
80 well established, relatively little remains known about non-TCR signals that could regulate their  
81 expression in T cells<sup>22</sup>. We considered that cytokine-mediated stimuli could also affect TOX expression  
82 levels without promoting the induction of T cell exhaustion. First, pro-inflammatory cytokines, like IL-15,  
83 can induce PD-1 without agonist TCR signals. Second,  $T_{\text{RM}}$  that are likely not detecting cognate Ag still  
84 upregulate PD-1 and other markers associated with exhaustion<sup>20, 21, 23, 24</sup>, yet rely on IL-15 signaling for  
85 maintenance in some tissues<sup>25, 26</sup>. Thus, inflammatory signals could provide an explanation for some of  
86 the seemingly disparate results of TOX expression and T cell function. Here, we show that pro-  
87 inflammatory cytokines were sufficient to induce TOX expression in the absence of agonist TCR signals

88 in both mouse and human CD8 T<sub>mem</sub>, while concurrently inducing expression of cytotoxic molecules.  
89 Together, these data demonstrate that TOX expression per se does not indicate TCR-mediated  
90 dysfunction or even a recent TCR signals. We also demonstrate that PD-1 expression is still upregulated  
91 in TOX-deficient T cells indicating that TOX is not necessary for PD-1 expression. Overall, our data  
92 reveal new TCR-independent mechanisms that shape TOX and PD-1 expression heterogeneity in T<sub>mem</sub>  
93 and indicate that these mechanisms are conserved in both mouse and human T cells. Though these  
94 findings ultimately complicate the use of TOX exclusively as an exhaustion biomarker, they implicate  
95 TOX in inflammation-driven programs of memory T cell activation.

96

## 97 Results

### 98 Cytokine stimulation induces TOX expression in murine CD8 T<sub>mem</sub>

99 The pro-inflammatory cytokines IL-12, IL-15, and IL-18 elicit interferon- $\gamma$  (IFN $\gamma$ ) and granzyme B  
100 (GzmB) expression in mouse and human CD8 T<sub>mem</sub> in the absence of agonist TCR signals<sup>27, 28, 29</sup>. We  
101 first sought to determine if these cytokines could also induce TOX expression in a TCR-independent  
102 manner. To generate a well-defined population of CD8 T<sub>mem</sub>, we transferred congenically-marked OT-I  
103 CD8 T cells, which express a TCR specific for the SIINFEKL peptide of OVA, into wildtype C57BL/6J  
104 animals followed by infection with OVA-expressing vesicular stomatitis virus (VSV-OVA) (**Fig. 1a**). We  
105 waited  $\geq 60$  days before using these mice for subsequent experiments (referred to as VSV-OVA OT-I  
106 memory mice) (**Fig. 1a**). We isolated T cells from the spleens and LNs from VSV-OVA OT-I memory  
107 mice using negative-selection magnet-activated cell sorting (MACS) prior to ex vivo stimulation  
108 experiments (**Fig. 1a**). This was done to ensure that cytokines act directly on T cells<sup>30</sup>. As a negative  
109 control, we cultured bulk T cells in media alone (mock) and as a positive control, we stimulated T cells  
110 with anti-CD3/CD28 microbeads (**Fig. 1a**). We used a combination of rIL-12, rIL-15, and rIL-18 (IL-  
111 12/15/18) to induce IFN $\gamma$  and GzmB expression in a TCR-independent manner (**Fig. 1a**). We found that  
112 IL-12/15/18 stimulation induced PD-1 expression in OT-I T<sub>mem</sub>, but the increase in expression was  
113 markedly higher after TCR ligation (**Fig. 1b**). PD-1 frequency and median fluorescence intensity (MedFI)  
114 in OT-I T<sub>mem</sub> increased throughout the duration of IL-12/15/18 stimulation (**Fig. 1b**). Similarly, TCR and  
115 IL-12/15/18 stimulation induced TOX upregulation in OT-I T<sub>mem</sub> (**Fig. 1c**). Next, we measured TCF1  
116 expression, a transcription factor needed for memory T cell self renewal that is lost in terminally  
117 exhausted T<sub>mem</sub><sup>31, 32, 33, 34</sup>. Alongside increasing PD-1 and TOX levels, both TCR- and IL-12/15/18-  
118 mediated stimulation led to significant loss of TCF1 expression in OT-I T<sub>mem</sub> (**Fig. 1d**). In sum, these data  
119 indicate that phenotypes often associated with exhaustion can be induced by TCR-independent,  
120 cytokine-mediated T<sub>mem</sub> activation. Finally, we sought to determine whether stimulation similarly affected  
121 endogenous CD8 T<sub>mem</sub> and CD8 T<sub>naïve</sub>. IL-12/15/18 stimulation significantly increased TOX expression in  
122 endogenous CD8 T<sub>mem</sub> but was not observed to the same degree in CD8 T<sub>naïve</sub> (**Supplemental Fig. 1a**,  
123 **b**). This CD8 T<sub>mem</sub>-specific response is, too, reflected in IL-12/15/18-mediated upregulation of PD-1

124 **(Supplemental Fig. 1c, d)**. This is likely, in some degree, to the different propensities of T cell subsets  
125 (both major and memory) to become efficiently activated by cytokines<sup>35</sup> and differences in cytokine  
126 receptor expression (particularly naïve T cells, which require TCR-mediated activation to induce IL-12R  
127 and strongly increase IL-18R expression<sup>36, 37</sup>). Much akin to OT-I T<sub>mem</sub>, TCR stimulation dramatically  
128 increased both TOX MedFl and PD-1 expression across endogenous subsets (**Supplemental fig. 1a-d**),  
129 though the fold change in TOX staining intensity was most pronounced in CD8 T<sub>mem</sub> (**Supplemental fig.**  
130 **1a**). Though IL-12/15/18 stimulation increases TOX MedFl in transgenic and endogenous CD8 T<sub>mem</sub>, it is  
131 initially to a lower degree than that of TCR-stimulated cells (**Fig. 1c, Supplemental fig. 1a**). Since short-  
132 term TCR- and IL-12/15/18-stimulation could dramatically augment TOX and PD-1 expression in CD8  
133 T<sub>mem</sub> from VSV-OVA OT-I memory mice, we next sought to test if TOX and PD-1 upregulation  
134 compromises functionality.

135

### 136 **Functional CD8 T<sub>mem</sub> express TOX and PD-1 and effector proteins**

137 We isolated T cells from VSV-OVA OT-I memory mice as outlined for Fig. 1. We stimulated T  
138 cells in the presence of Golgi inhibitors and found that OT-I T<sub>mem</sub> produced substantial amounts of IFN $\gamma$   
139 after IL-12/15/18 or TCR stimulation(**Fig. 2a**); yet IFN $\gamma$ -expressing OT-I T<sub>mem</sub> demonstrated higher TOX  
140 and PD-1 expression than those that failed to make IFN $\gamma$  (**Fig. 2b, c**). Similarly, OT-I T<sub>mem</sub> that produced  
141 GzmB post-stimulation also demonstrated increased TOX and PD-1 expression (**Supplemental fig. 2a,**  
142 **b**). Together, these data indicate that TOX and PD-1 expression are elevated in activated, functional  
143 CD8 T<sub>mem</sub> and suggest that TOX expression is also part of a cytokine-driven T cell activation program.

144

### 145 **Induction of TOX and PD-1 is heterogeneous in CD8 T<sub>mem</sub>**

146 To ensure that our data were not solely reliant on OT-I T cells, we also generated gBT-I memory  
147 mice using gBT-I TCR transgenic cells (specific for an epitope of the HSV2 gB protein) and a  
148 recombinant, gB epitope-expressing LM strain (LM-gB) (**Supplemental Fig. 3b**). After stable contraction  
149 of TCR transgenic T<sub>mem</sub> ( $\geq 60$ d), we conducted stimulation assays as previously outlined (**Fig. 1a**). IL-  
150 12/15/18- or TCR-mediated stimulation led to comparable TOX upregulation in OT-I and gBT-I T<sub>mem</sub> (**Fig**

151 **3a, b**). Similarly, PD-1 expression was comparable in OT-I and gBT-I  $T_{mem}$  after stimulation  
152 (**Supplemental Fig 3c, d**), with a concurrent loss of TCF1 expression (**Supplemental Fig. 3e, f**). We  
153 next asked if altering the nature of the priming infection could affect the ability to express TOX in  
154 response to cytokine-mediated activation at the memory stage. We adoptively transferred P14 transgenic  
155 T cells, a TCR transgenic specific for lymphocytic choriomeningitis virus (LCMV) gp33, followed by  
156 infection with LCMV Armstrong or Docile (**Supplemental Fig. 3g, h**). These LCMV strains elicit acute  
157 and chronic infections, respectively (the latter causing T cell dysfunction). We then stimulated (same  
158 culture set-up as outlined in **Fig. 1a**) T cells from these P14 memory mice. P14  $T_{mem}$  from LCMV  
159 Armstrong infected mice readily upregulated PD-1 after TCR- or IL-12/15/18 stimulation (**Supplemental**  
160 **Fig. 3i**). The exhausted P14  $T_{mem}$  from LCMV Docile-infected mice already uniformly expressed PD-1  
161 prior to stimulation; but IL-12/15/18 or TCR stimulation further increased surface PD-1 expression (via  
162 increased MedFI) (**Supplemental Fig. 3j**). P14  $T_{mem}$  from LCMV Armstrong infected mice increased TOX  
163 expression after TCR or IL-12/15/18 stimulation (**Fig. 3c**). However, exhausted P14  $T_{mem}$  from LCMV  
164 Docile-infected mice only significantly increased TOX expression after TCR stimulation (**Fig. 3d**) and  
165 showed significantly lower fold changes in TOX MedFI compared to P14  $T_{mem}$  from LCMV Armstrong-  
166 infected mice. While differences between CD8  $T_{mem}$  from acute and chronic infected are expected, the  
167 differences between gBT-I and OT-I (~3 to 4-fold increase in TOX expression) compared to P14 (up to  
168 ~2-fold) need to be interpreted with caution since the gBT-I, OT-I and P14 experiments used different  
169 TOX antibody clones (REA473 and TXRX10, respectively). Overall, our data indicate that  $T_{mem}$  that were  
170 generated by different acute infections increase TOX expression in response to pro-inflammatory  
171 cytokines suggesting that this a broadly applicable mechanism of TOX induction in the memory T cell  
172 compartment. We next sought to determine if PD-1 and TOX upregulation in response to stimulation was  
173 similarly recapitulated in human CD8 T cells.

#### 174 175 **Cytokine stimulation induces TOX and PD-1 in human $T_{mem}$**

176 Using cryopreserved PBMCs from healthy, HIV-seronegative donors, we interrogated TOX and  
177 PD-1 expression by flow cytometry. We specifically gated CD8 T cells by a memory and naïve binary,



178 delineating CD8 T<sub>naïve</sub> as CD45RO-negative CCR7-positive, with remaining cells as CD8 T<sub>mem</sub><sup>38</sup> (**Fig. 4a**),  
179 and interrogated basal TOX and PD-1 expression between these two subsets (**Fig. 4a**). Since PD-1  
180 expression is heterogeneous in humans<sup>39, 40</sup>, we measured TOX MedFI across PD-1 low-, medium-, and  
181 high-expressing events. We found that CD8 T<sub>mem</sub> with the highest PD-1 expression also demonstrated  
182 significantly elevated TOX MedFI (**Fig 4b**), mirroring correlations of TOX and PD-1 expression in our  
183 mouse model as well as human HCV infections<sup>6</sup>. We next tested whether IL-12/15/18 stimulation  
184 increases PD-1 and TOX expression in T cell subsets and included mock and TCR stimulation conditions  
185 as negative and positive controls, respectively. We also included stimulations using rIL-6, rIL-15, or rIL-  
186 12 and rIL-18. We chose these additional conditions as IL-6 activates CD8 T<sub>naïve</sub> (as evidenced by CD69  
187 upregulation) and to discern individual activating contributions of each cytokine (**Supplemental Fig. 4a**).  
188 Across these conditions, IL-12/15/18- and TCR-mediated stimulations led to the most prominent increase  
189 of TOX staining intensity and PD-1<sup>hi</sup> frequency in CD8 T<sub>mem</sub> (**Fig. 4d**). We measured TCF1 expression  
190 after mock, IL-12/15/18, and TCR stimulation. A decrease in TCF1 expression accompanied an increase  
191 in TOX and PD-1 expression after IL-12/15/18 or TCR stimulation (**Supplemental fig. 4b**), akin to our  
192 mouse stimulation data. We further tested the degree of similarity between human and mouse T cells by  
193 measuring PD-1, TCF1, and TOX expression profiles in stimulated human CD8 T<sub>naïve</sub>. Like mouse CD8  
194 T<sub>naïve</sub>, only TCR stimulation could lead to appreciable changes in TOX and PD-1 within human CD8 T<sub>naïve</sub>  
195 (**Fig. 4c, Supplemental fig. 4c**). Since IL-6 can activate CD8 T<sub>naïve</sub>, we used this condition to determine  
196 if PD-1 and TOX expression could occur in naïve T cells in the absence of a TCR signal. Despite  
197 inducing CD69 expression, we found that IL-6-mediated stimulation failed to increase TOX or PD-1  
198 expression in CD8 T<sub>naïve</sub> (**Supplemental fig. 4d**). Together, these data show that CD8 T<sub>mem</sub> differentially  
199 expressed TOX, PD-1, and TCF1 at homeostasis and after both IL-12/15/18 and TCR stimulation. We  
200 next wanted to better define these changes across different memory T cell subsets.

201

### 202 **Inflammation-induced PD-1 and TOX expression occur in most but not all CD8 T<sub>mem</sub> subsets**

203 To test if inflammation-induced PD-1 and TOX expression differs across human CD8 T<sub>mem</sub>  
204 subsets, we used CD45RO and CCR7 staining to further delineate central memory (T<sub>CM</sub>) (CD45RO<sup>+</sup>

205 CCR7<sup>+</sup>), T<sub>EM</sub> (CD45RO<sup>+</sup> CCR7<sup>-</sup>), and T<sub>EMRA</sub> (CD45RO<sup>-</sup> CCR7<sup>-</sup>) subsets<sup>38, 41</sup> (**Fig. 5a**). When we  
206 measured TOX, PD-1, and TCF1 expression across these subsets, we noted that a substantial fraction  
207 of CD8 T<sub>EM</sub> events were PD-1<sup>hi</sup>, and both CD8 T<sub>EM</sub> and T<sub>EMRA</sub> expressed elevated and lower levels of  
208 TOX and TCF1, respectively, at homeostasis (**Fig. 5b**). While this observation is in line with the initial  
209 report demonstrating TOX heterogeneity in human CD8 T<sub>mem</sub> subsets<sup>17</sup>, it remained unknown if these  
210 CD8 T<sub>mem</sub> subsets are equally capable of further TOX upregulation after stimulation. We observed that  
211 TOX, PD-1, and TCF1 expression kinetics in CD8 T<sub>CM</sub> and T<sub>EM</sub> largely resembled one another, with both  
212 IL-12/15/18 and TCR stimulation increasing the frequency of PD-1<sup>hi</sup> events and TOX MedFI, but  
213 decreasing TCF1 MedFI (**Fig. 5c**). It is worth noting, that while TCF1 MedFI in CD8 T<sub>CM</sub> drops profoundly  
214 after IL-12/15/18 or TCR stimulation, the loss in frequency of TCF1-expressing cells (as defined by  
215 subjective gating) is not as pronounced as what we observed in CD8 T<sub>EM</sub> (**Supplemental fig. 5a**). While  
216 IL-12/15/18- and TCR-mediated stimulation were both able to significantly increase the frequency of PD-  
217 1<sup>hi</sup> events and lower TCF1 MedFI in CD8 T<sub>EMRA</sub>, the degree of these changes was less pronounced than  
218 in CD8 T<sub>CM</sub> or T<sub>EM</sub> (**Fig. 5c**). Moreover, CD8 T<sub>EMRA</sub> did not significantly upregulate TOX expression after  
219 TCR stimulation. This, however, was not due to inability to be stimulated, as CD8 T<sub>EMRA</sub> readily  
220 expressed the activation marker CD69 after cytokine- or TCR-mediated stimulation (**Supplemental Fig.**  
221 **5a**). Finally, it is worth noting that when stimulated with IL-15 alone, CD8 T<sub>CM</sub>, unlike CD8 T<sub>EM</sub> and T<sub>EMRA</sub>,  
222 fail to significantly express PD-1 (**Supplemental fig. 5b**).

223 We next interrogated T cells with defined TCR specificity, specifically influenza A virus (IAV)-  
224 specific CD8 T cells using HLA-A\*02 tetramers loaded with the GILGFVFTL peptide (**Fig. 6a**). We  
225 examined this CD8 T<sub>mem</sub> population because these cells were reported to not express appreciable levels  
226 of TOX at homeostasis, likely owing to their T<sub>CM</sub> phenotype<sup>17</sup>. Within our sample set, IAV-specific CD8 T  
227 cells were predominantly T<sub>CM</sub> in half of the HLA-A\*02 PBMC donors (**Fig. 6a**). Nevertheless, all IAV-  
228 specific CD8 T cells were able to substantially upregulate TOX and PD-1 expression after IL-12/15/18  
229 stimulation (**Fig. 6b**), indicating that CD8 T<sub>mem</sub> low for TOX and PD-1 at homeostasis, can also contribute  
230 to TOX and PD-1 heterogeneity after recent activation. Alongside testing IAV-specific CD8 T cells, we  
231 also interrogated the effects of stimulation in mucosal associated invariant T (MAIT) cells. We selected

232 this population because 1) MAIT cells are non-conventional T cells, recognizing bacterial metabolites as  
233 Ags presented on MHC-related 1 (MR1)<sup>42</sup>, 2) inflammation is necessary for sustained MAIT cell effector  
234 function<sup>43, 44</sup> and 3) MAIT cells are near-uniformly T<sub>EM</sub> when defined by CD45RO and CCR7<sup>45</sup>. We  
235 identified MAIT cells using MR1 tetramers loaded with the 5-OP-RU metabolite<sup>46</sup>, which largely fell into  
236 our T<sub>EM</sub> gate (**Fig. 6c**). Like IAV-specific CD8 T cells, IL-12/15/18 stimulation led to substantial TOX and  
237 PD-1 upregulation in MAIT cells (**Fig. 6d**). Since inflammation is necessary for sustained MAIT cell  
238 effector function, we asked if MAIT cells are differentially capable of responding to other cytokine  
239 combinations. Alongside IL-12/15/18, IL-15 alone, or IL-12 and IL-18 in unison could significantly  
240 increase both the PD-1<sup>hi</sup> frequency and TOX MedFI of MAIT cells, but not IAV-specific T cells  
241 (**Supplemental fig. 6a, b**). Together, these data indicate that this cytokine-driven activation program is  
242 conserved across conventional and innate-like T cells.

243

#### 244 **Cytokine stimulation-induced PD-1 expression is independent of TOX**

245 Finally, since PD-1 and TOX upregulation appeared tightly associated following cytokine-driven  
246 activation, we next asked if this association is mechanistic in nature. If TOX is necessary for PD-1  
247 expression, it would allow to use the surface-expressed PD-1 as a surrogate for the intracellularly  
248 expressed TOX. TOX expression appears to drive PD-1 expression in a number of contexts, as  
249 exhausted T<sub>mem</sub> dramatically downregulated PD-1 after TOX deletion or knockdown<sup>6, 13, 15, 47</sup>. Conversely,  
250 T cell transduction with TOX-encoding constructs leads to PD-1 upregulation<sup>13, 14, 15, 47</sup>. While TOX  
251 controls PD-1 expression during exhaustion, the role of TOX is less clear in activation. To dissect the  
252 function of TOX in stimulation-mediated PD-1 upregulation, we used wildtype (WT) and *Tox*<sup>-/-</sup> P14 T<sub>mem</sub>.  
253 To generate these P14 T<sub>mem</sub>, we adoptively transferred wildtype or knockout P14 T cells into C57BL/6J  
254 hosts, which we subsequently infected with LCMV Armstrong to form a T<sub>mem</sub> population (**Supplemental**  
255 **fig. 7a**). To determine if TOX deficiency alters stimulation-induced PD-1 upregulation, we cultured  
256 MACS-isolated T cells from WT and *Tox*<sup>-/-</sup> P14 memory mice (28 days post LCMV Armstrong infection)  
257 in the presence of mock, IL-12/15/18, or TCR stimulation (**Supplemental fig. 7a**). Both WT and *Tox*<sup>-/-</sup>  
258 P14 T<sub>mem</sub> increased PD-1 expression after IL-12/15/18 or TCR stimulation (**Fig. 7a, b, c**). Together these

259 data indicate that TOX alone is not necessary for PD-1 upregulation in cytokine-stimulated CD8 T<sub>mem</sub> and  
260 suggest other transcription factors are sufficient to drive PD-1 expression in the absence of TOX.  
261  
262

## 263 Discussion

264 TOX has been foremost studied in TCR-mediated exhaustion of mouse CD8 T cells in context of  
265 tumor or chronic infection<sup>6, 13, 14</sup>. A recent study reported TOX expression in functional circulating human  
266 CD8 T<sub>mem</sub>, suggesting TOX expression does not necessarily dictate dysfunction<sup>17, 18</sup>, which led to the  
267 speculation that TOX may have distinct roles across species, specifically mice and humans<sup>19</sup>.  
268 Alternatively, TOX expression heterogeneity in humans may simply reflect the more complex  
269 environment that human T cells are exposed to in every day life, that may not be readily appreciable in  
270 specific pathogen-free mice, such as routine inflammatory events in barrier tissues. Thus, we asked if  
271 pro-inflammatory cues could be sufficient to increase TOX expression and contribute to TOX  
272 heterogeneity. While inflammation has been previously shown to enhance TCR-mediated TOX  
273 upregulation (in a VEGF-A-dependent manner that necessitates initial TCR signaling)<sup>48</sup>, our findings are,  
274 to the best of our knowledge, the first to demonstrate TOX expression in the absence of agonist TCR  
275 signals. Transient IL-12/15/18 and TCR stimulation increased PD-1 and TOX expression in most CD8  
276 T<sub>mem</sub>. In mouse, dysfunctional P14 T<sub>mem</sub> from LCMV Docile infected mice still increased surface PD-1  
277 expression after TCR stimulation, while IL-12/15/18 had little to no effect on TOX expression. Similarly,  
278 human T<sub>EMRA</sub> showed limited to no increase in TOX expression following exposure to IL-12/15/18. The  
279 underlying mechanisms will require further investigation, but one could speculate that the cytokine  
280 stimulation is simply not potent enough to further enhance the already ongoing effector or activation  
281 program in these two memory T cell subsets. The notion that TOX, but also PD-1 expression can  
282 indicate an ongoing effector or activation program in CD8 T cells is important, since PD-1 and (now also)  
283 TOX are used as biomarkers of T cell exhaustion<sup>49, 50, 51</sup>. Of note, certain features of general activation  
284 programs of CD8 T<sub>mem</sub> appear to be well conserved and have also been reported as transcriptomic  
285 overlap of tissue-resident, recently-activated, and exhausted CD8 T cells<sup>52</sup>. While infection parameters  
286 and inflammatory events are well defined in mouse model studies, most human studies remain agnostic  
287 in regard to the infection and activation history of Ag-specific T cells. This in turn makes it difficult to  
288 correctly interpret the underlying reason for expression of PD-1 and TOX by human T cells.

289

290 Our data emphasize the need for conservative interpretation of TOX in regard to activation and  
291 exhaustion and also caution against interpreting TOX expression purely through the lens of recent TCR-  
292 mediated activation. TOX expression has been predictive of T cell exhaustion and unfavorable outcome  
293 in hepatocellular carcinoma animal models and clinical samples<sup>53</sup>, in line with the paradigm of TOX-  
294 mediated TCR-dependent T cell dysfunction. However, other studies have yielded contradictory data.  
295 Meta analyses of TOX expression in breast cancers reported TOX levels paradoxically correlating with  
296 increased immune cell function and favorable prognosis<sup>54</sup>. This is perplexing, as in tumors, TOX  
297 expression is associated with T cell dysfunction<sup>6, 13, 14</sup>. This discrepancy could in part be explained by  
298 TOX upregulation during activation, akin to what we observed during T cell activation in TCR-dependent  
299 and -independent stimulations. Thus, our data stress that all possible activation pathways of TOX and  
300 PD-1 induction must be considered before interpreting TOX as a biomarker of T cell dysfunction. A well  
301 done human study that interrogated TOX heterogeneity found elevated TOX in CMV- and EBV-specific  
302 CD8 T<sub>mem</sub> and hypothesized recent viral reactivation provided cognate Ag to facilitate TCR-mediated  
303 upregulation of TOX. This is certainly a plausible explanation, but our data highlight the need to also  
304 consider recent exposure to inflammation as a critical parameter affecting TOX expression. Conventional  
305 CD8 T<sub>EM</sub> and T<sub>EMRA</sub> (the predominant phenotype of CMV- and EBV-specific CD8 T cells) express  
306 elevated levels of TOX basally, T<sub>CM</sub> (including IAV-specific CD8 T cells) and innate-like MAIT cells can,  
307 too, upregulate TOX expression following inflammation-mediated activation. Importantly, our data  
308 highlight that this mechanism of TOX expression is conserved across species, conventional CD8 T<sub>mem</sub>  
309 subsets, and innate-like MAIT cells.

310 Since pro-inflammatory cytokines can concurrently induce TOX and PD-1 expression, these  
311 signals may drive TOX heterogeneity in other contexts. P14 tissue-resident memory T cells showed  
312 increased *Tox* expression at homeostasis, which has been observed 90 days post priming with LCMV  
313 Armstrong<sup>20</sup>. Since the acute infection is cleared well before this timepoint, it is unlikely that continued  
314 TCR signaling by cognate Ag drives this phenotype, despite elevated transcripts encoding mediators of  
315 TCR signaling<sup>20</sup>. IL-15, however, is likely present within the tissue microenvironment. IL-15 has been  
316 implicated in T<sub>RM</sub> maintenance<sup>25, 26</sup>, and transcriptional profiles indicative of IL-15/STAT5 signaling can be

317 detected in human  $T_{RM}$ <sup>23, 24</sup>. Thus, IL-15 in tissue microenvironments may also contribute to TOX  
318 heterogeneity. Future work will be necessary to dissect the role of these inflammatory cues versus other  
319 signals that can shape  $T_{RM}$  phenotype, such as co-stimulation and tonic TCR signaling<sup>21</sup>.

320 Previous studies have demonstrated that TOX ablation or knockdown leads to PD-1  
321 downregulation in models of exhaustion<sup>6, 13, 15, 47</sup>, and conversely, introduction of TOX-expressing  
322 constructs enhances PD-1 expression<sup>15, 47</sup>. Similarly, our data showed a close correlation in regards to  
323 TOX and PD-1 expression levels, but we found that PD-1 expression could be induced in stimulated  $Tox^{-}$   
324  $^{-}$  P14  $T_{mem}$ . Of note, these  $Tox^{-}$  P14  $T_{mem}$  lack exon 5, which abrogates the ability to function as a  
325 transcription factor, but the truncated protein is still expressed and detected by the TOX antibody. Alfei et  
326 al. previously showed that the early wave of effector cells formed from  $Tox^{-}$   $T_{naive}$  expressed significant  
327 levels of PD-1 independently of functional TOX. However, TOX was required for the expression of high  
328 levels of PD-1 at later stages, once the initial population of exhausted effector T cells had been replaced  
329 by a proliferation competent TCF1 progenitor population<sup>31</sup>. Together, these data suggest that long-term  
330 expression of PD-1 requires TOX, but activation-induced expression of PD-1 is TOX-independent. In the  
331 absence of TOX, PD-1 expression could be driven TOX2, which can induce PD-1 expression in CD8 T  
332 cells<sup>15, 47</sup>; however, it remains unclear if TOX2 is also upregulated by transient TCR- or cytokine-  
333 mediated stimulation. Similarly, how different activating signals integrate to regulate TOX expression also  
334 requires further studies: while inflammatory cues increase TOX expression in memory T cells, increased  
335 IL-12 signaling during the priming of  $T_{naive}$  has been shown to limit subsequent TOX expression at steady  
336 state<sup>55, 56</sup>.

337 Overall, our data suggest that the mechanisms that regulate TOX expression, both at  
338 homeostasis and after transient TCR or cytokine stimulation, are remarkably similar and quite possibly  
339 highly conserved between humans and mice. Our data further highlight the need to consider TOX and  
340 PD-1 expression as prominent indicators of ongoing activation and effector programs in  $T_{mem}$  instead of  
341 exclusive biomarkers of exhaustion.

342

## 343 **Materials and methods**

344

### 345 **Mice**

346 Mouse protocols and experimentation conducted at the Fred Hutchinson Cancer Research  
347 Center were approved by and in compliance with the ethical regulations of the Fred Hutchinson Cancer  
348 Research Center's Institutional Animal Care and Use Committee. Experiments performed at the  
349 Technical University of Munich were in compliance with institutional and governmental regulations in  
350 Germany and approved by the veterinarian authorities of the Regierung von Oberbayern in Germany. All  
351 animals were maintained in specific pathogen-free facilities and infected in modified pathogen-free  
352 facilities. Experimental groups were non-blinded, animals were randomly assigned to experimental  
353 groups, and no specific method was used to calculate sample sizes.

354

355 We purchased 6-week-old female C67BL/6J mice from the Jackson Laboratory; *Tox*<sup>-/-</sup> P14 mice  
356 (P14 *Tox*<sup>tm1c(KOMP)Wtsi</sup>; *Mx*<sup>Cre</sup>; *Rosa26-STOP-eYFP*) were generated as previously described<sup>6</sup>. Both WT  
357 and *Tox*<sup>-/-</sup> P14 mice, OT-I mice, and gBT-I mice were maintained on CD45.1 congenic backgrounds. We  
358 euthanized mice in accordance with institutional protocols and subsequently collected spleens and lymph  
359 nodes (LNs) for experimentation.

360

### 361 **Development of memory mice**

362 We prepared a single-cell suspension of LN cells that were harvested from female OT-I, P14, or  
363 gBT-I mice by mechanically passing LN tissue through a 70-100µm strainer. To enrich transgenic T cells,  
364 we used MACS with a CD8 negative selection kit (Miltenyi Biotec).

365

366 For OT-I memory mice, we adoptively transferred  $1 \times 10^4$  OT-I T cells in sterile 1x PBS i.v. per  
367 C57BL/6J recipient, and subsequently infected recipients i.v. with  $1-2 \times 10^7$  PFU OVA-expressing  
368 vesicular stomatitis virus (VSV-OVA) or  $4 \times 10^3$  CFU OVA-expressing *Listeria monocytogenes* (LM-  
369 OVA). For gBT-I memory mice, we adoptively transferred  $5 \times 10^4$  gBT-I T cells i.v. and subsequently



370 infected recipient mice i.v. with or  $4 \times 10^3$  CFU herpes simplex virus 2 (HSV2) glycoprotein B (gB)-  
371 expressing *L. monocytogenes* (LM-gB). We allowed  $\geq 60$  days to pass after initial VSV or LM infections  
372 before assaying tissues.

373

374 For P14 memory mice, we adoptively transferred  $2 \times 10^3$  WT P14 T cells i.v. and subsequently  
375 infected recipient mice i.v. with  $2 \times 10^5$  PFU LCMV Armstrong clone (LCMV Arm.) or  $2 \times 10^6$  PFU  
376 LCMV Docile clone (LCMV Doc.). For *Tox*<sup>-/-</sup> P14 memory mice, we adoptively transferred  $2 \times 10^3$  *Tox*<sup>-/-</sup>  
377 P14 memory mice and subsequently infected with  $2 \times 10^5$  PFU LCMV Arm.; we allowed 28 days to pass  
378 after initial LCMV infection before assaying tissues.

379

### 380 **Human PBMC and study approval**

381 Twenty-three healthy, HIV-uninfected adults were recruited by the Seattle HIV Vaccine Trials Unit  
382 (Seattle, Washington, USA) as part of the study “Establishing Immunologic Assays for Determining HIV-1  
383 Prevention and Control.” These samples are also known as the Seattle Area Control (SAC) Cohort. All  
384 participants were provided and signed informed consent, and the Fred Hutchinson Cancer Research  
385 Center Institutional Review Board approved the study protocol.

386

### 387 **T cell isolation and in vitro stimulation**

388 We harvested spleen and LN from memory mice and mechanically prepared single-cell  
389 suspensions. We thawed  $\sim 4 \times 10^7$  cryopreserved PBMC in human RP10 media (RPMI1640  
390 supplemented with 10% FBS, 2mM L-glutamine, 100 U/mL penicillin-streptomycin). To enrich bulk T cells  
391 from single cell suspensions, we respectively used mouse- and human-specific T cell negative isolation  
392 MACS (STEMCELL Technologies, Canada). We plated  $0.5\text{--}1 \times 10^6$  T cells per well in 96-well V-bottom  
393 tissue culture plates. We cultured cells in human RP10 or mouse RP10 media (RPMI 1640  
394 supplemented with 10% FBS, 2mM L-glutamine, 100 U/mL penicillin-streptomycin, 1mM sodium  
395 pyruvate, 0.05mM  $\beta$ -mercaptoethanol, and 1mM HEPES). To stimulate cells, we cultured mouse T cells  
396 in mouse RP10 with rIL-12, rIL-15, and rIL-18 (BioLegend) (each at 100ng/mL), with Dynabeads mouse

397 T-Activator (Thermo Fisher) anti-CD3/CD28 beads (at a 1:1 bead:cell ratio), or with media alone. For  
398 human T cell stimulations, we used human RP10 media with combinations of rIL-6 (BioLegend), rIL-12,  
399 rIL-15, and/or rIL-18 (Peprotech) (each at 100ng/mL), with Dynabeads human T-Activator (Thermo  
400 Fisher) anti-CD3/CD28 beads (at a 1:1 bead:cell ratio), or with RP10 alone. We cultured cells at 37°C,  
401 5% CO<sub>2</sub>, sampling cells at 0, 24, and 48 hours for flow staining. For intracellular cytokine staining (ICS),  
402 we added GolgiPlug (BD Biosciences) at a 1:1,000 dilution 8 hours prior to cell harvest.

403

#### 404 **Flow cytometric analysis**

405 We conducted all flow staining for mouse and human T cells on ice and at room temperature,  
406 respectively. All mouse and human flow panel reagent information, stain conditions, and gating are  
407 included in **(Supplemental Fig. 8-11, Supplemental tables 1-6)**. We conducted LIVE/DEAD fixable  
408 aqua or blue viability dye (AViD or BViD, respectively) or Zombie Near-IR viability dye (NIRViD) staining in  
409 1× PBS. For surface staining, we utilized FACSWash (1× PBS supplemented with 2% FBS and 0.2%  
410 sodium azide) as the stain diluent. For all TOX staining panels, we fixed cells with the FOXP3  
411 fixation/permeabilization buffer kit (Thermo Fisher) and conducted intranuclear stains using the FOXP3  
412 permeabilization buffer (Thermo Fisher) as diluent. To minimize day-to-day variation for TOX staining, we  
413 conducted all intracellular stains within a batch (0, 24, and 48-hour samples) at the same time. We  
414 resuspended cells in FACSWash and acquired events on a FACSSymphony, which we analyzed using  
415 FlowJo v10 (BD Biosciences). We conducted statistical testing using Prism v8 (GraphPad).

416

#### 417 **Acknowledgements:**

418 We thank Andrea Schietinger for helpful discussions and critical review of the manuscript. We  
419 also thank the Prlic lab, especially Jami Erickson, Florian Mair, Marie Frutoso, and Veronica Davé for  
420 critical review of the manuscript. This work was supported by National Institutes of Health grant R01  
421 AI123323 (to M.P.), National Cancer Institute Grant F99 CA245735 (to N.J.M). N.J.M. is a Leslie and  
422 Pete Higgins Achievement Rewards for College Scientists Fellow and Dr. Nancy Herrigel-Babienko

423 Memorial Scholar. D.Z. and J.B were supported by a European Research Council consolidator grant  
424 (ToCCaTa) and by the German Research Foundation (SFB1054 and SFB1371).

425  
426

## References

- 427 1. Zajac, A.J. *et al.* Viral immune evasion due to persistence of activated T cells without  
428 effector function. *J Exp Med* **188**, 2205-2213 (1998).  
429
- 430 2. Pauken, K.E. & Wherry, E.J. Overcoming T cell exhaustion in infection and cancer.  
431 *Trends Immunol* **36**, 265-276 (2015).  
432
- 433 3. Schietinger, A. & Greenberg, P.D. Tolerance and exhaustion: defining mechanisms of T  
434 cell dysfunction. *Trends Immunol* **35**, 51-60 (2014).  
435
- 436 4. Goepfert, P.A. *et al.* A significant number of human immunodeficiency virus epitope-  
437 specific cytotoxic T lymphocytes detected by tetramer binding do not produce gamma  
438 interferon. *J Virol* **74**, 10249-10255 (2000).  
439
- 440 5. Zehn, D., Utzschneider, D.T. & Thimme, R. Immune-surveillance through exhausted  
441 effector T-cells. *Curr Opin Virol* **16**, 49-54 (2016).  
442
- 443 6. Alfei, F. *et al.* TOX reinforces the phenotype and longevity of exhausted T cells in chronic  
444 viral infection. *Nature* **571**, 265-269 (2019).  
445
- 446 7. Lee, P.P. *et al.* Characterization of circulating T cells specific for tumor-associated  
447 antigens in melanoma patients. *Nat Med* **5**, 677-685 (1999).  
448
- 449 8. Utzschneider, D.T. *et al.* T cells maintain an exhausted phenotype after antigen  
450 withdrawal and population reexpansion. *Nat Immunol* **14**, 603-610 (2013).  
451
- 452 9. Speiser, D.E. *et al.* T cell differentiation in chronic infection and cancer: functional  
453 adaptation or exhaustion? *Nat Rev Immunol* **14**, 768-774 (2014).  
454
- 455 10. Barber, D.L. *et al.* Restoring function in exhausted CD8 T cells during chronic viral  
456 infection. *Nature* **439**, 682-687 (2006).  
457
- 458 11. Schietinger, A. *et al.* Tumor-Specific T Cell Dysfunction Is a Dynamic Antigen-Driven  
459 Differentiation Program Initiated Early during Tumorigenesis. *Immunity* **45**, 389-401  
460 (2016).  
461
- 462 12. Blackburn, S.D., Shin, H., Freeman, G.J. & Wherry, E.J. Selective expansion of a subset  
463 of exhausted CD8 T cells by alphaPD-L1 blockade. *Proc Natl Acad Sci U S A* **105**,  
464 15016-15021 (2008).  
465
- 466 13. Scott, A.C. *et al.* TOX is a critical regulator of tumour-specific T cell differentiation. *Nature*  
467 **571**, 270-274 (2019).  
468

- 469 14. Khan, O. *et al.* TOX transcriptionally and epigenetically programs CD8(+) T cell  
470 exhaustion. *Nature* **571**, 211-218 (2019).  
471
- 472 15. Seo, H. *et al.* TOX and TOX2 transcription factors cooperate with NR4A transcription  
473 factors to impose CD8(+) T cell exhaustion. *Proc Natl Acad Sci U S A* **116**, 12410-12415  
474 (2019).  
475
- 476 16. Yao, C. *et al.* Single-cell RNA-seq reveals TOX as a key regulator of CD8(+) T cell  
477 persistence in chronic infection. *Nat Immunol* **20**, 890-901 (2019).  
478
- 479 17. Sekine, T. *et al.* TOX is expressed by exhausted and polyfunctional human effector  
480 memory CD8(+) T cells. *Sci Immunol* **5** (2020).  
481
- 482 18. Galletti, G. *et al.* Two subsets of stem-like CD8(+) memory T cell progenitors with distinct  
483 fate commitments in humans. *Nat Immunol* **21**, 1552-1562 (2020).  
484
- 485 19. Utzschneider, D.T. & Kallies, A. Human effector T cells express TOX-Not so "TOX"ic  
486 after all. *Sci Immunol* **5** (2020).  
487
- 488 20. Kurd, N.S. *et al.* Early precursors and molecular determinants of tissue-resident memory  
489 CD8(+) T lymphocytes revealed by single-cell RNA sequencing. *Sci Immunol* **5** (2020).  
490
- 491 21. Wang, Z. *et al.* PD-1(hi) CD8(+) resident memory T cells balance immunity and fibrotic  
492 sequelae. *Sci Immunol* **4** (2019).  
493
- 494 22. Kinter, A.L. *et al.* The common gamma-chain cytokines IL-2, IL-7, IL-15, and IL-21 induce  
495 the expression of programmed death-1 and its ligands. *J Immunol* **181**, 6738-6746  
496 (2008).  
497
- 498 23. Hombrink, P. *et al.* Erratum: Programs for the persistence, vigilance and control of human  
499 CD8(+) lung-resident memory T cells. *Nat Immunol* **18**, 246 (2017).  
500
- 501 24. Hombrink, P. *et al.* Programs for the persistence, vigilance and control of human CD8(+)  
502 lung-resident memory T cells. *Nat Immunol* **17**, 1467-1478 (2016).  
503
- 504 25. Mackay, L.K. *et al.* The developmental pathway for CD103(+)CD8+ tissue-resident  
505 memory T cells of skin. *Nat Immunol* **14**, 1294-1301 (2013).  
506
- 507 26. Mackay, L.K. *et al.* T-box Transcription Factors Combine with the Cytokines TGF-beta  
508 and IL-15 to Control Tissue-Resident Memory T Cell Fate. *Immunity* **43**, 1101-1111  
509 (2015).  
510
- 511 27. Freeman, B.E., Hammarlund, E., Raue, H.P. & Slifka, M.K. Regulation of innate CD8+ T-  
512 cell activation mediated by cytokines. *Proc Natl Acad Sci U S A* **109**, 9971-9976 (2012).  
513
- 514 28. Liu, K., Catalfamo, M., Li, Y., Henkart, P.A. & Weng, N.P. IL-15 mimics T cell receptor  
515 crosslinking in the induction of cellular proliferation, gene expression, and cytotoxicity in  
516 CD8+ memory T cells. *Proc Natl Acad Sci U S A* **99**, 6192-6197 (2002).  
517

- 518 29. Smeltz, R.B. Profound enhancement of the IL-12/IL-18 pathway of IFN-gamma secretion  
519 in human CD8+ memory T cell subsets via IL-15. *J Immunol* **178**, 4786-4792 (2007).  
520
- 521 30. Martin, M.D. *et al.* Bystander responses impact accurate detection of murine and human  
522 antigen-specific CD8 T cells. *J Clin Invest* **129**, 3894-3908 (2019).  
523
- 524 31. Utzschneider, D.T. *et al.* T Cell Factor 1-Expressing Memory-like CD8(+) T Cells Sustain  
525 the Immune Response to Chronic Viral Infections. *Immunity* **45**, 415-427 (2016).  
526
- 527 32. Hudson, W.H. *et al.* Proliferating Transitory T Cells with an Effector-like Transcriptional  
528 Signature Emerge from PD-1(+) Stem-like CD8(+) T Cells during Chronic Infection.  
529 *Immunity* **51**, 1043-1058 e1044 (2019).  
530
- 531 33. Yu, S. *et al.* The TCF-1 and LEF-1 transcription factors have cooperative and opposing  
532 roles in T cell development and malignancy. *Immunity* **37**, 813-826 (2012).  
533
- 534 34. Zhou, X. *et al.* Differentiation and persistence of memory CD8(+) T cells depend on T cell  
535 factor 1. *Immunity* **33**, 229-240 (2010).  
536
- 537 35. Maurice, N.J., Taber, A.K. & Prlic, M. The Ugly Duckling Turned to Swan: A Change in  
538 Perception of Bystander-Activated Memory CD8 T Cells. *J Immunol* **206**, 455-462 (2021).  
539
- 540 36. Li, W., Kashiwamura, S., Ueda, H., Sekiyama, A. & Okamura, H. Protection of CD8+ T  
541 cells from activation-induced cell death by IL-18. *J Leukoc Biol* **82**, 142-151 (2007).  
542
- 543 37. Valenzuela, J., Schmidt, C. & Mescher, M. The roles of IL-12 in providing a third signal  
544 for clonal expansion of naive CD8 T cells. *J Immunol* **169**, 6842-6849 (2002).  
545
- 546 38. Jameson, S.C. & Masopust, D. Understanding Subset Diversity in T Cell Memory.  
547 *Immunity* **48**, 214-226 (2018).  
548
- 549 39. Duraiswamy, J. *et al.* Phenotype, function, and gene expression profiles of programmed  
550 death-1(hi) CD8 T cells in healthy human adults. *J Immunol* **186**, 4200-4212 (2011).  
551
- 552 40. Beura, L.K. *et al.* Normalizing the environment recapitulates adult human immune traits in  
553 laboratory mice. *Nature* **532**, 512-516 (2016).  
554
- 555 41. Sallusto, F., Lenig, D., Forster, R., Lipp, M. & Lanzavecchia, A. Two subsets of memory T  
556 lymphocytes with distinct homing potentials and effector functions. *Nature* **401**, 708-712  
557 (1999).  
558
- 559 42. Kjer-Nielsen, L. *et al.* MR1 presents microbial vitamin B metabolites to MAIT cells. *Nature*  
560 **491**, 717-723 (2012).  
561
- 562 43. Berkson, J.D. & Prlic, M. The MAIT conundrum - how human MAIT cells distinguish  
563 bacterial colonization from infection in mucosal barrier tissues. *Immunol Lett* **192**, 7-11  
564 (2017).  
565
- 566 44. Slichter, C.K. *et al.* Distinct activation thresholds of human conventional and innate-like  
567 memory T cells. *JCI Insight* **1** (2016).

568  
569  
570  
571  
572  
573  
574  
575  
576  
577  
578  
579  
580  
581  
582  
583  
584  
585  
586  
587  
588  
589  
590  
591  
592  
593  
594  
595  
596  
597  
598  
599  
600  
601  
602  
603  
604  
605  
606  
607  
608  
609  
610

45. Voillet, V. *et al.* Human MAIT cells exit peripheral tissues and recirculate via lymph in steady state conditions. *JCI Insight* **3** (2018).
46. Reantragoon, R. *et al.* Antigen-loaded MR1 tetramers define T cell receptor heterogeneity in mucosal-associated invariant T cells. *J Exp Med* **210**, 2305-2320 (2013).
47. Correction for Seo *et al.*, TOX and TOX2 transcription factors cooperate with NR4A transcription factors to impose CD8(+) T cell exhaustion. *Proc Natl Acad Sci U S A* **116**, 19761 (2019).
48. Kim, C.G. *et al.* VEGF-A drives TOX-dependent T cell exhaustion in anti-PD-1-resistant microsatellite stable colorectal cancers. *Sci Immunol* **4** (2019).
49. Blank, C.U. *et al.* Defining 'T cell exhaustion'. *Nat Rev Immunol* **19**, 665-674 (2019).
50. Heim, K. *et al.* TOX defines the degree of CD8+ T cell dysfunction in distinct phases of chronic HBV infection. *Gut* (2020).
51. Guo, L. *et al.* TOX correlates with prognosis, immune infiltration, and T cells exhaustion in lung adenocarcinoma. *Cancer Med* **9**, 6694-6709 (2020).
52. Kumar, B.V. *et al.* Human Tissue-Resident Memory T Cells Are Defined by Core Transcriptional and Functional Signatures in Lymphoid and Mucosal Sites. *Cell Rep* **20**, 2921-2934 (2017).
53. Wang, X. *et al.* TOX promotes the exhaustion of antitumor CD8(+) T cells by preventing PD1 degradation in hepatocellular carcinoma. *J Hepatol* **71**, 731-741 (2019).
54. Arora, M., Kumari, S., Singh, J., Chopra, A. & Chauhan, S.S. Expression pattern, regulation, and clinical significance of TOX in breast cancer. *Cancer Immunol Immunother* (2020).
55. Tucker, C.G. *et al.* Adoptive T Cell Therapy with IL-12-Preconditioned Low-Avidity T Cells Prevents Exhaustion and Results in Enhanced T Cell Activation, Enhanced Tumor Clearance, and Decreased Risk for Autoimmunity. *J Immunol* **205**, 1449-1460 (2020).
56. Page, N. *et al.* Expression of the DNA-Binding Factor TOX Promotes the Encephalitogenic Potential of Microbe-Induced Autoreactive CD8(+) T Cells. *Immunity* **48**, 937-950 e938 (2018).

## 611 **Figure Legends**

612

### 613 **Figure 1. Cytokine stimulation induces TOX expression in murine CD8 T<sub>mem</sub>**

614 **a** Schematic of OT-I memory mouse generation (top) and subsequent stimulation assays (bottom). OT-I  
615 T<sub>naive</sub> were transferred and expanded with VSV-OVA, then aged to stable memory contraction; after, T  
616 cells were enriched from VSV-OVA expanded OT-I memory animals and stimulated with media alone  
617 (mock), IL-12, -15, and -18 in combination (IL-12/15/18) (each at 100ng/mL), or anti-CD3/CD28  
618 microbeads (TCR) at a ~1:1 bead:cell ratio. **b-c** expression of **b** PD-1, **c** TOX, and **d** TCF1 within  
619 stimulated OT-I T<sub>mem</sub> throughout experiment time course. TOX MedFI fold change in **c** was calculated  
620 against average TOX MedFI from mock stimulations in a subset-specific, batch-specific, and timepoint-  
621 specific manner. In **b** and **c**, bar chart symbols represent one animal at a unique timepoint/condition and  
622 are connected by animal identity, with bar indicating mean; the indicated statistical significances were  
623 calculated using Wilcoxon matched-pairs signed rank tests. In **b-d**, symbols in line plots comparing  
624 stimulation conditions represent the mean across all animals for a specific timepoint/condition ± SD; the  
625 indicated statistical significances were calculated using Mann-Whitney tests. Figures in **b** and **c** depict  
626 results from *n* = 14 mice across 7 experiments. Figures in **d** depict results from *n* = 9 mice across 2  
627 experiments. All representative flow plots are sourced from the same animal.

628

### 629 **Figure 2. TOX and PD-1 expression occur in functional CD8 T cells**

630 **a-c** Intracellular cytokine staining (ICS) in tandem with TOX interrogation. **a** Experiment schematic, in  
631 which bulk T cells from VSV-OVA OT-I memory mice were stimulated (mock, black; IL-12/15/18, blue;  
632 TCR, red). Cells were treated with GolgiPlug 18h into stimulation and harvested for flow staining and  
633 analysis at 24h. **b, c** Expression of **b** TOX and **c** PD-1 in IFN $\gamma$ <sup>+</sup> and IFN $\gamma$ <sup>-</sup> OT-I T<sub>mem</sub>. Representative  
634 plots depict cells from the same animal across different stimulation conditions. Symbols in **b** and **c**  
635 represent a T cell population within a unique animal with symbols connected by animal identity (*n* = 6  
636 across 2 experiments). Bars represent mean and indicated statistical significances were calculated by  
637 Wilcoxon matched-pairs signed rank test.

638

639 **Figure 3 Cytokine-mediated TOX induction is limited in exhausted T cells**

640 **a-b** Changes in TOX expression within LM-expanded TCR transgenic  $T_{mem}$ : OT-I, specific for OVA Ag  
641 and gBT-I, specific for gB Ag. MACS-enriched T cells from LM-expanded OT-I or gBT-I memory mice  
642 were stimulated with media alone (mock), recombinant IL-12, -15, and -18 in combination (IL-12/15/18)  
643 (each at 100ng/mL), or anti-CD3/CD28 microbeads (TCR) at a ~1:1 cell:bead ratio. **a, b** Representative  
644 TOX expression and TOX MedFI fold change during stimulation in LM-primed **a** OT-I and **b** gBT-I  $T_{mem}$ .  
645 **c-d** Changes in TOX expression within LCMV-specific TCR transgenic P14 T cells expanded by acute  
646 (Armstrong, Arm.) or chronic (Docile, Doc.) LCMV infection. **c, d** Representative TOX expression and  
647 TOX MedFI fold change during stimulation in P14 T cells primed by **c** LCMV Armstrong and **d** LCMV  
648 Docile. TOX MedFI fold change in **a-d** was calculated against average TOX MedFI within mock  
649 stimulation in a batch-specific, timepoint-specific manner. We calculated indicated statistical  
650 significances in **a-d** using Wilcoxon matched-pairs signed rank tests. Each symbol in **a-d** represents a  
651 sample at a unique timepoint/condition, with bars delineating mean, which are connected by donor in **a-d**  
652 ( $n = 4$  LM-OVA expanded OT-I memory mice across 2 experiments;  $n = 10$  LM-gB expanded gBT-I  
653 memory mice across 2 experiments;  $n = 17$  LCMV Armstrong-expanded P14 memory mice across 4  
654 experiments;  $n = 8$  LCMV Docile-expanded P14 memory mice across 2 experiments). Mouse identities  
655 are consistent between representative flow plots within the same generation/adoptive transfer condition.

656

657 **Figure 4. Inflammatory cytokines are potent inducers of TOX and PD-1 in human  $T_{mem}$**

658 **a** Basal expression of TOX and PD-1 in CD8  $T_{mem}$  and  $T_{naive}$ . **b** TOX MedFI across PD-1 low, medium,  
659 and high expressing CD8  $T_{mem}$ . **c** Schematic detailing T cell isolation from cryopreserved PBMCs and  
660 subsequent stimulation with recombinant IL-6, IL-15, IL-12 and -18, IL-12 and -15 and -18 (all at  
661 100ng/mL, each), or anti-CD3/CD28 microbeads (TCR, 1:1 bead to cell ratio) and subsequent flow  
662 interrogation. **d** TOX expression (MedFI) and PD-1<sup>hi</sup> frequency in CD8  $T_{mem}$  throughout stimulation time  
663 course. **e, f** Comparison of TOX MedFI and PD-1<sup>hi</sup> frequency in mock-, IL-12/15/18-, and TCR-stimulated  
664 **e** CD8  $T_{mem}$  and **f** CD8  $T_{naive}$ . In **a, b, d, e, f** we calculated indicated statistical significances by **a, d**



665 Wilcoxon matched-pairs signed rank tests, **b** Friedman test with Dunn's multiple comparisons tests, or **e**,  
666 **f** Mann-Whitney tests. In **a**, **d** each symbol represents a unique timepoint/treatment connected by donor  
667 with bars indicating mean **a** ( $n = 23$  across four experiments) **d** ( $n = 11$  across two experiments). In **e**, **f**  
668 each symbol represents the mean  $\pm$  SD of the stimulation condition from  $n = 23$  donors across four  
669 experiments. Representative plots from **a**, **d**, **f** are sourced from the same donor.

670

### 671 **Figure 5. TOX and PD-1 upregulation are largely independent of $T_{mem}$ subset**

672 **a-c** Basal and stimulation-induced TOX and PD-1 expression in CD8 memory subsets. **a** Representative  
673 gating of CD8 T cells into naïve ( $T_{naïve}$ , grey), central memory ( $T_{CM}$ , orange), effector memory ( $T_{EM}$ ,  
674 purple), and effector memory CD45RA-expressing ( $T_{EMRA}$ , green) subsets. **b** basal expression levels  
675 (MedFI) of TOX and TCF1 and frequency of PD-1<sup>hi</sup> cells across CD8 T cell memory subsets. **c** TOX  
676 MedFI, PD-1<sup>hi</sup> frequency, and TCF1 MedFI after mock (black), IL-12/15/18 (each at 100ng/mL, blue), or  
677 TCR (1:1 bead to cell ratio, red) stimulation in CD8  $T_{CM}$  (left column), CD8  $T_{EM}$  (center column), and CD8  
678  $T_{EMRA}$  (right column). Symbols in **b** and **c** represent unique samples (by timepoint/condition/subset) and  
679 are connected by donor identity, with bars representing mean. We determined statistical significances in  
680 **b** and **c** respectively using Friedman tests and Wilcoxon matched-pairs signed rank tests. **b** and **c** depict  
681  $n = 23$  donors across four experiments, except for TCF1 plots, which depict  $n = 12$  donors across two  
682 experiments.

683

### 684 **Figure 6. Stimulation induces TOX and PD-1 expression in conventional and innate-like T cells**

685 **a-b** TOX and PD-1 induction in influenza A virus (IAV)-specific CD8 T cells. **a** Gating and memory  
686 phenotyping of IAV-specific CD8 T cells. **b** Induction of TOX and PD-1 in IAV- specific CD8 T cells by  
687 mock (black) or IL-12/15/18 (each at 100ng/mL, blue) stimulation. **c-d** TOX and PD-1 induction in  
688 mucosal associated invariant T (MAIT) cells. **c** Gating and memory phenotyping of MAIT cells. **d**  
689 Induction of TOX and PD-1 in MAIT cells by mock (black) or IL-12/15/18 (each at 100ng/mL, blue)  
690 stimulation. Representative plots in **a-d** are sourced from the same donor. Symbols in **a-d** represent  
691 unique samples (by timepoint/condition/subset) and are connected by donor identity, with bars

692 representing mean. We determined statistical significances in **b** and **d** using Wilcoxon matched-pairs  
693 signed rank tests. **a** and **b** depict  $n = 8$  donors across two experiments; **c** and **d** depict  $n = 23$  donors  
694 across four experiments.

695

696 **Figure 7. TOX deficiency does not abrogate stimulation-induced PD-1 expression**

697 **a-c** Stimulation-induced PD-1 expression in WT and  $Tox^{-/-}$  P14  $T_{mem}$ . T cells were stimulated with media  
698 alone (mock), recombinant IL-12, -15, and -18 in combination (IL-12/15/18 or ILs) (each at 100ng/mL), or  
699 with anti-CD3/CD28 microbeads at an ~1:1 cell:bead ratio (TCR). **a**, **b** PD-1 MedFl and expression  
700 frequencies in **a** WT or **b**  $Tox^{-/-}$  P14  $T_{mem}$  over stimulation time course. **c** Comparison of PD-1 MedFl and  
701 expression frequencies between IL-12/15/18 (left) or TCR (right) stimulated WT and  $Tox^{-/-}$  P14  $T_{mem}$ . All  
702 indicated statistical significances were calculated using Mann-Whitney tests. Symbols in **a** and **b**  
703 represent the mean  $\pm$  SD from all animals at a specific time/condition; and symbols in **c** represent  
704 stimulated P14  $T_{mem}$  populations within a single animal ( $n = 9$  WT P14 recipients and  $n = 10$   $Tox^{-/-}$  P14  
705 recipient across 2 experiments).

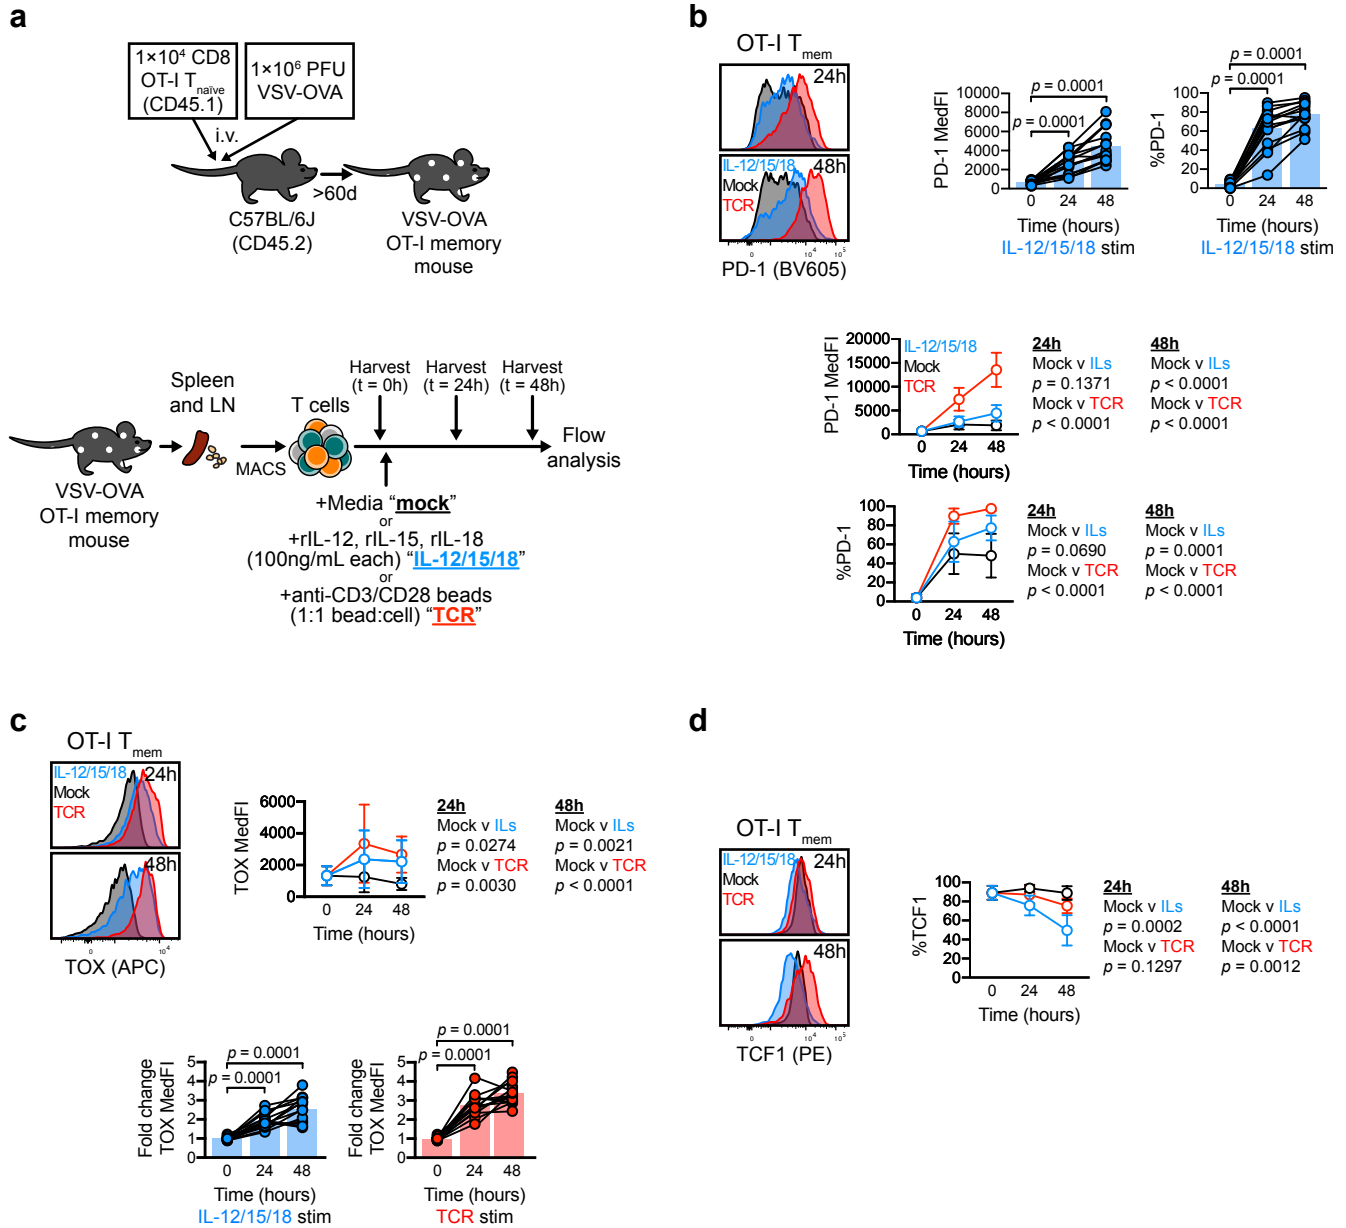

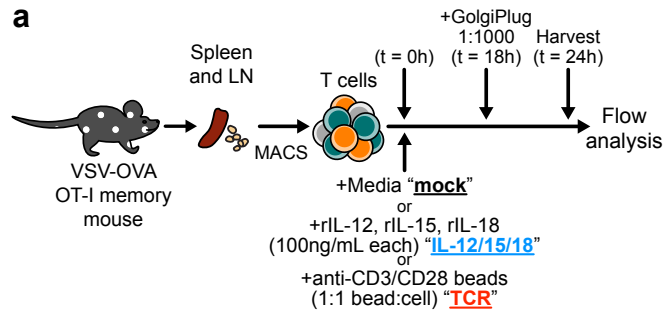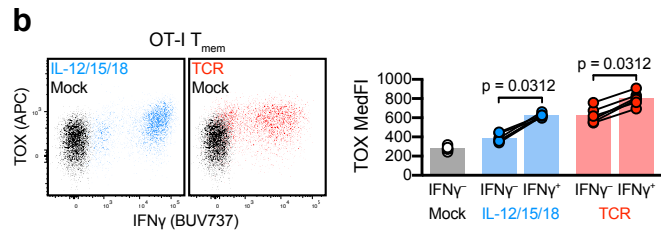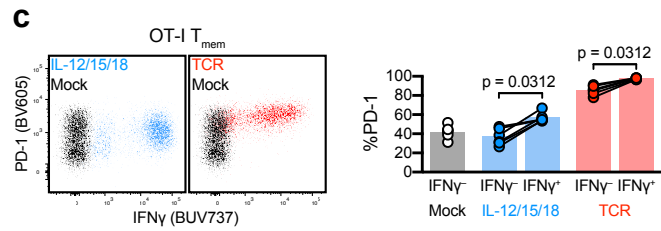

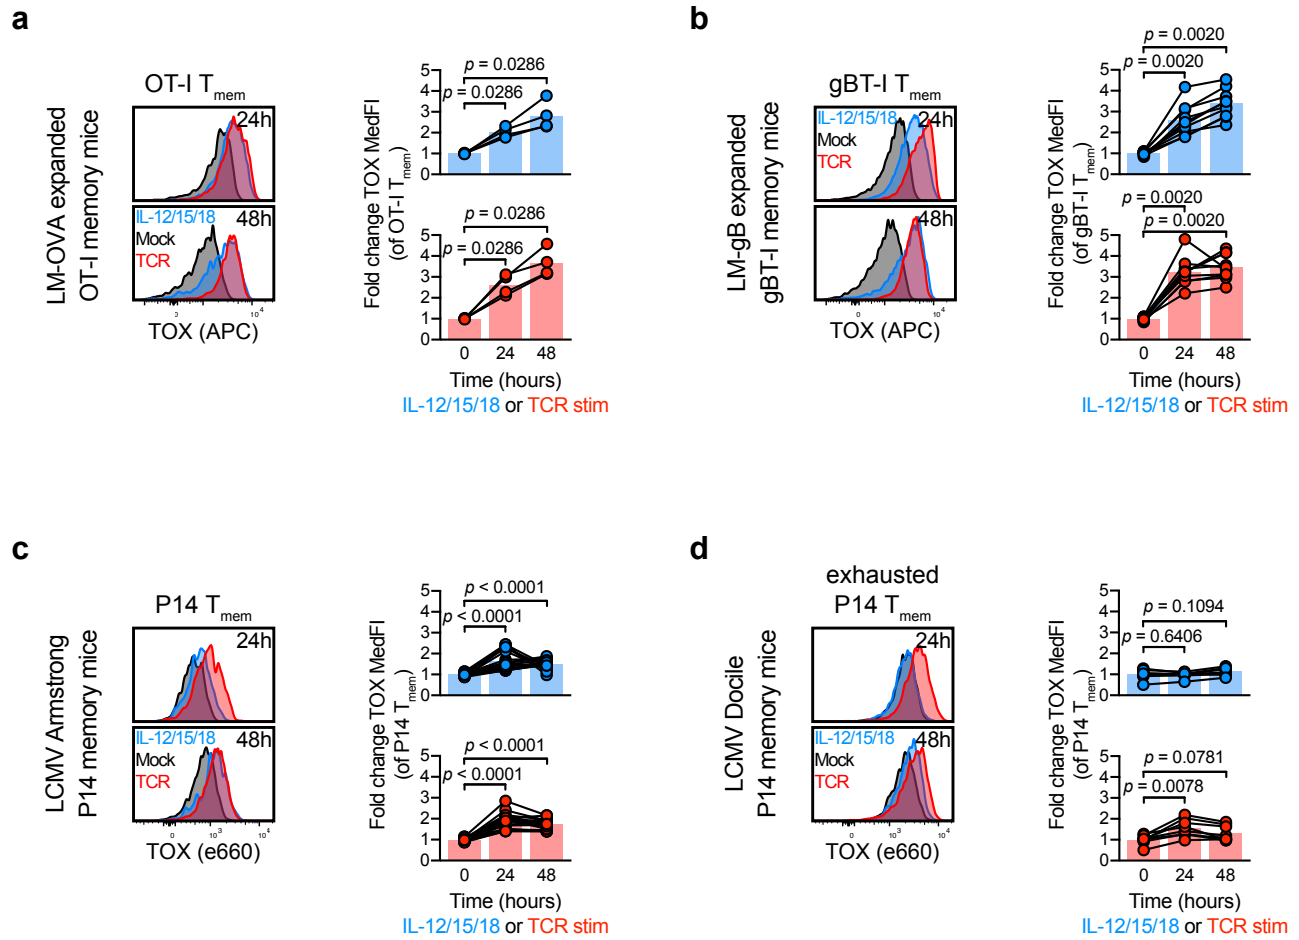

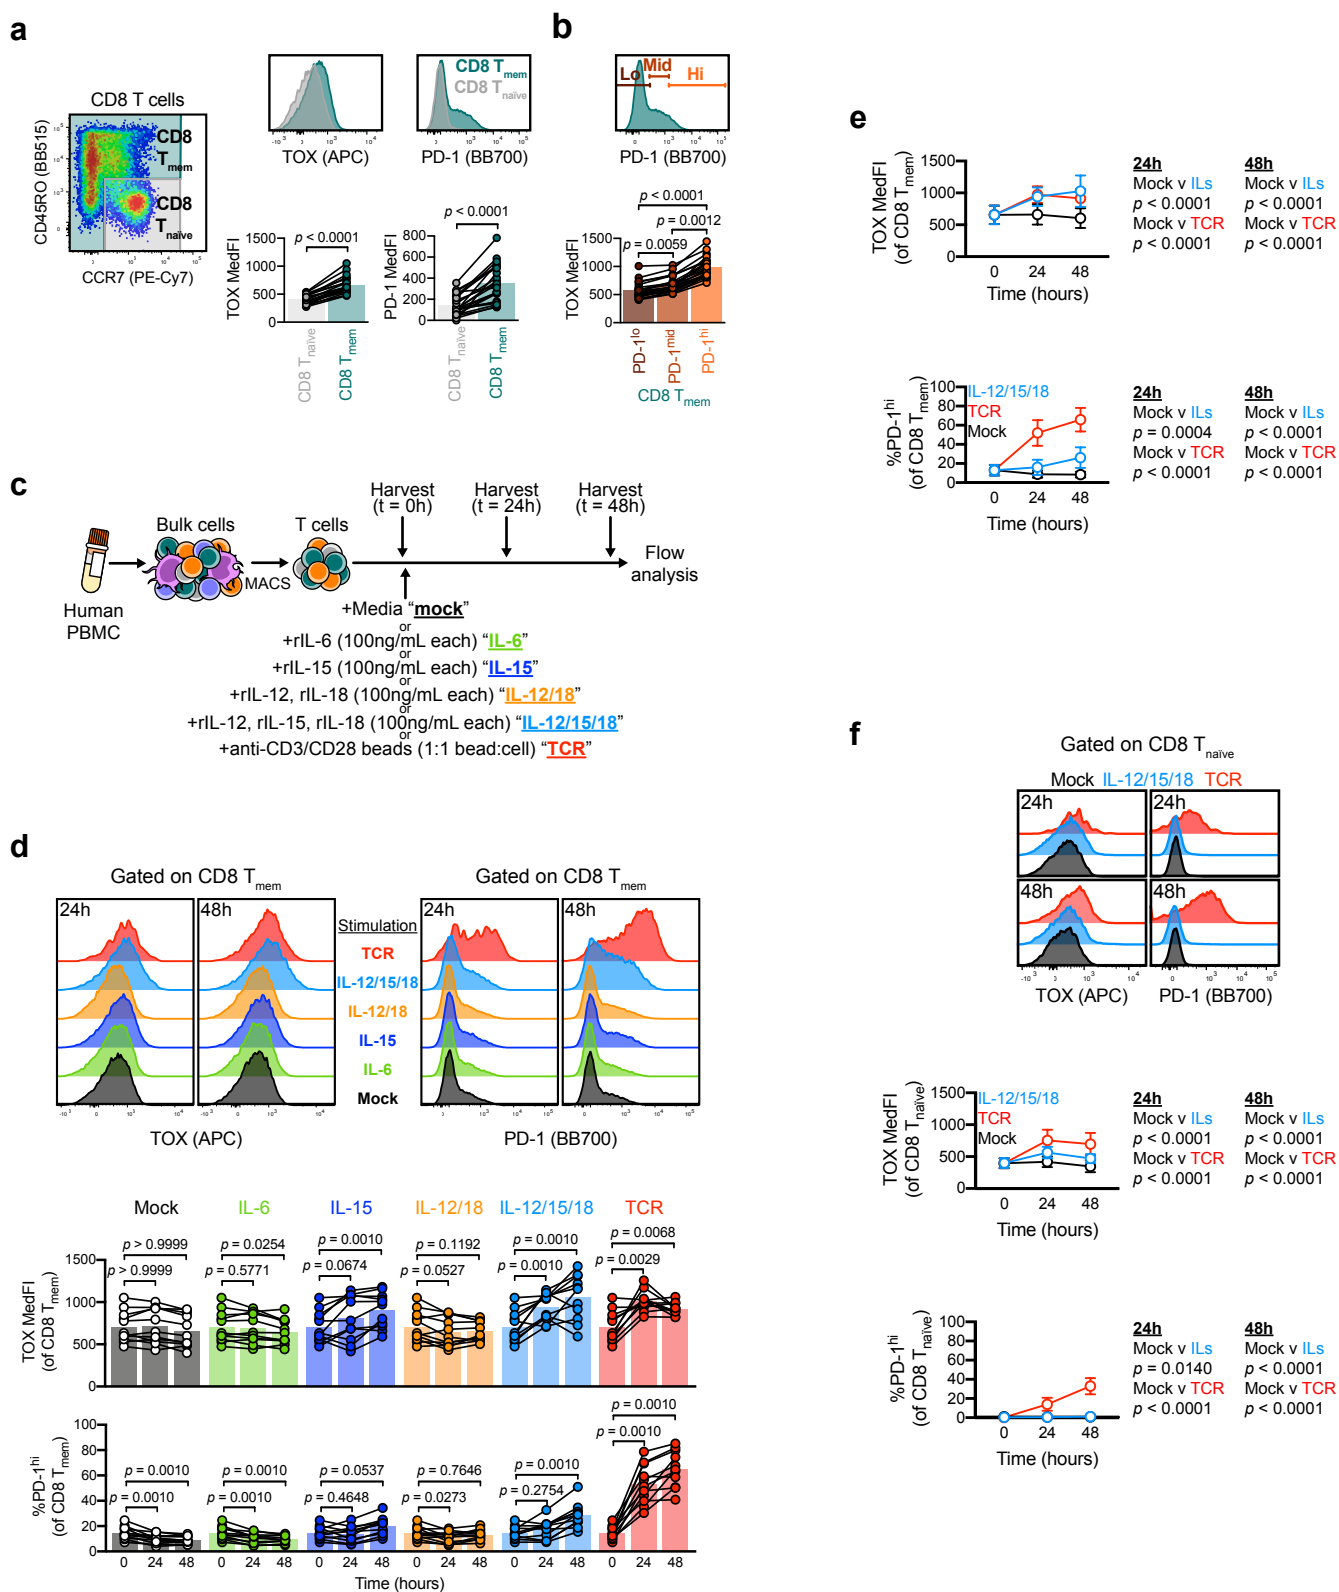

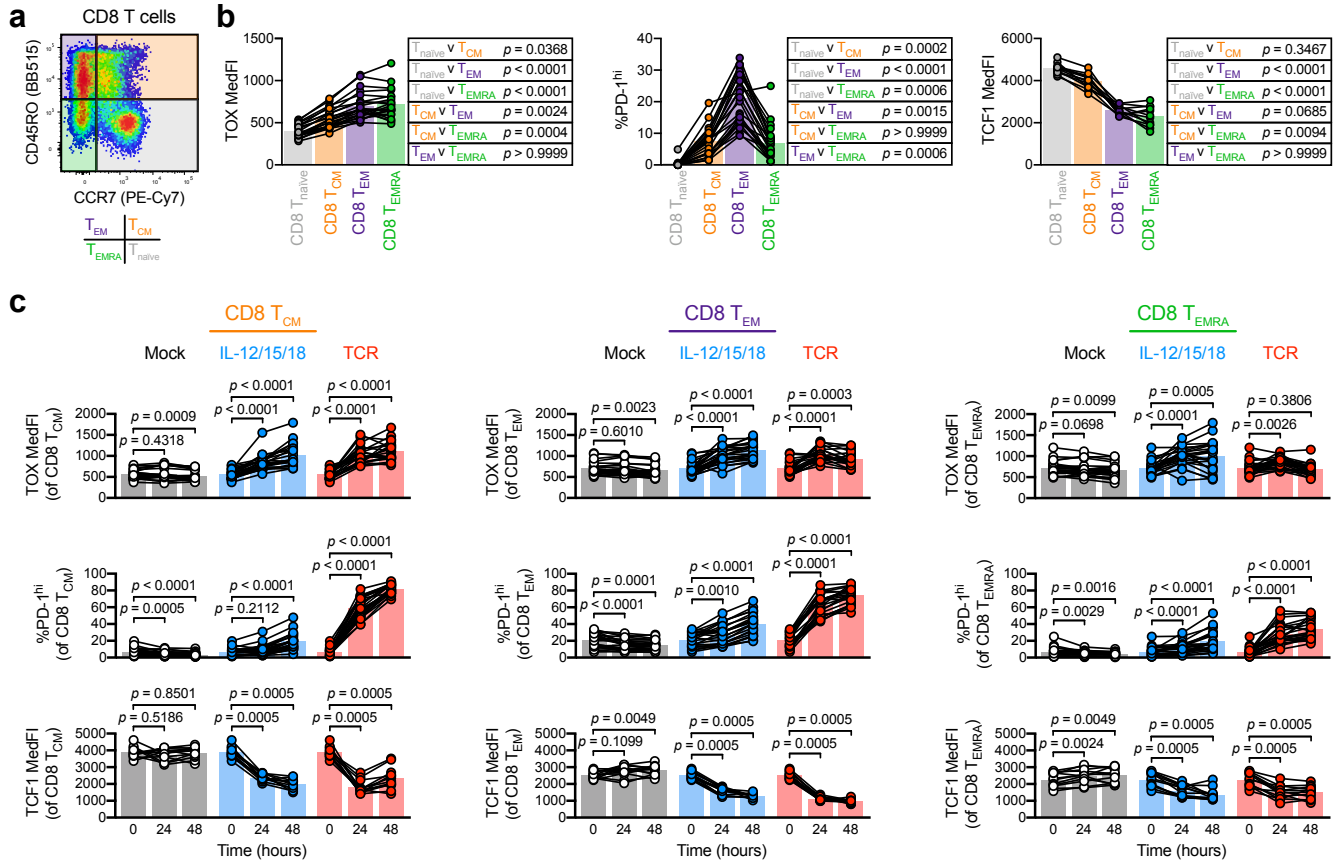

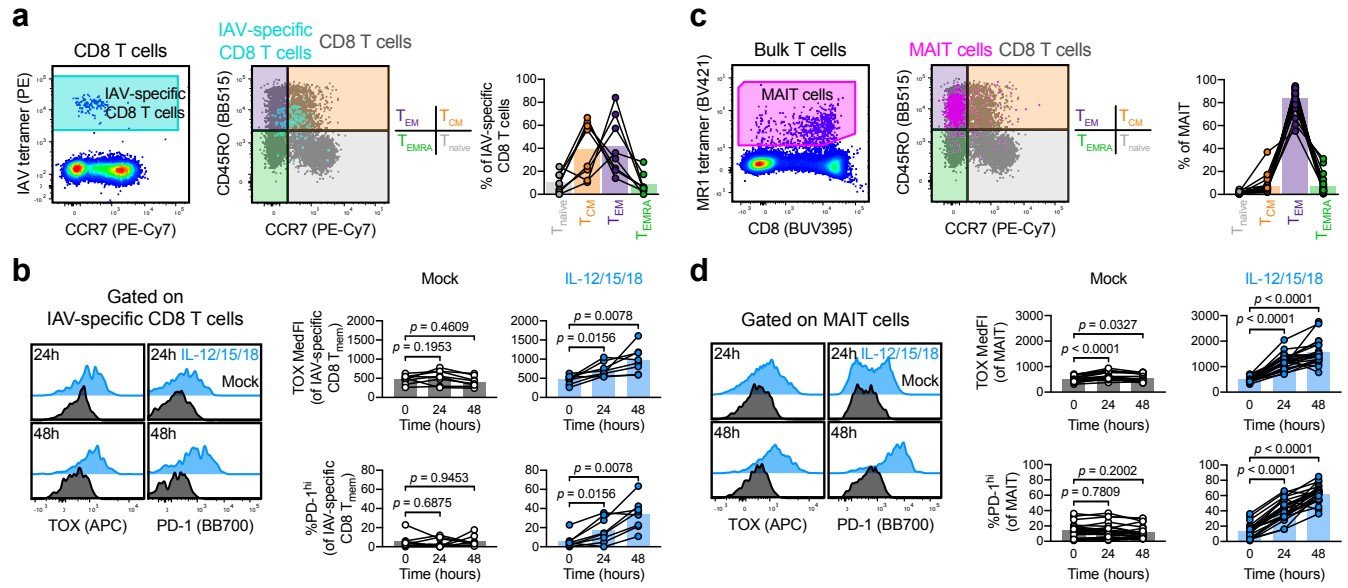



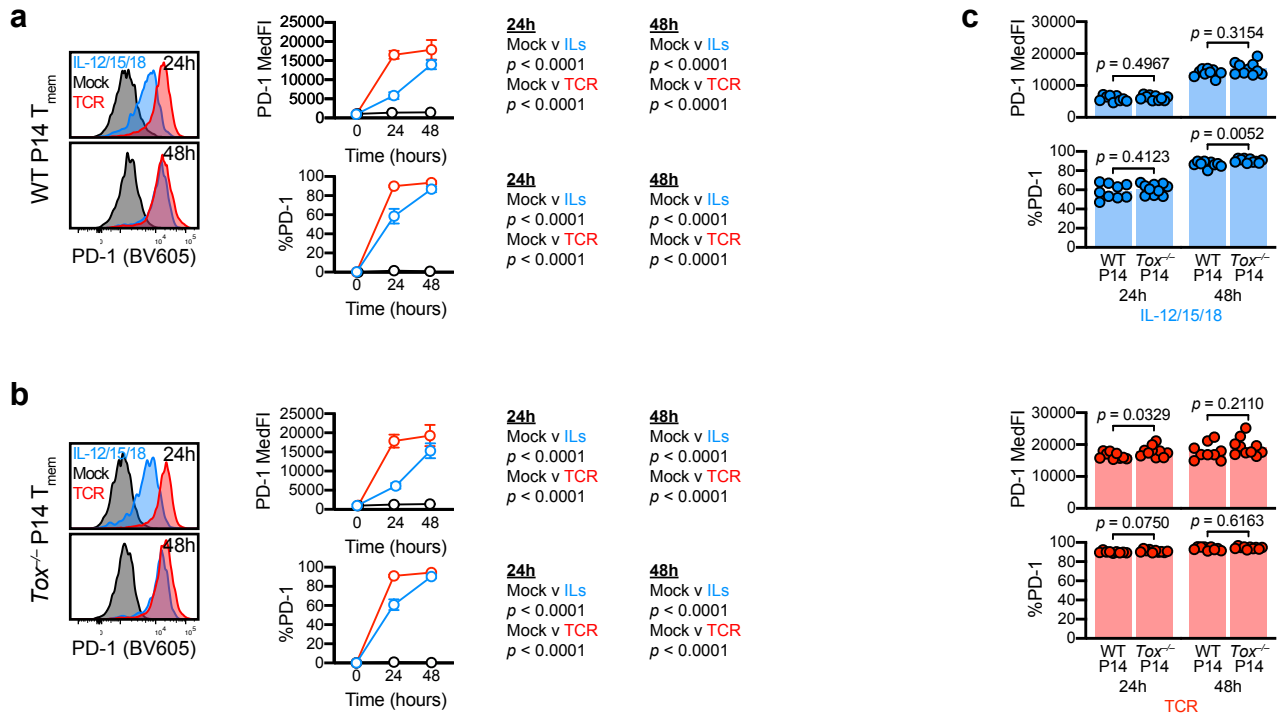

Source: https://biorxiv.org/content/10.1101/2021.03.15.435527v1.full.pdf
